# Supplementary material
Source: PubMed Central journal article supplement (PMC6026333)
Supplement: mmc1.pdf [file mmc1.pdf]

**Biophysical Journal, Volume 114**

**Supplemental Information**

**Thermodynamics of Conformational Transitions in a Disordered Protein Backbone Model**

**Justin A. Drake and B. Montgomery Pettitt**

# Thermodynamics of conformational transitions in a disordered protein backbone model

Justin A. Drake and B. Montgomery Pettitt\*<sup>1</sup><sup>1</sup>Sealy Center for Structural Biology and Molecular Biophysics, The University of Texas Medical Branch, Galveston, Texas 77555-0304, USA

\*Correspondence: mpettitt@utmb.edu

## 1 SUPPLEMENTARY INFORMATION

Table S1: Conformational entropy as a function of the number of glycine residues in oligoglycine. Entropy units are cal/mol/K. Entropy was calculated using the QHA ( $S^{\text{QHA}}$ ), BQH ( $S^{\text{BQH}}$ ), and MIE ( $S^{\text{MIE}}$ ) methods.  $S_{\text{res}}^{\text{MIE}}$  is estimated from the distributions of  $\phi$ - $\psi$  dihedrals within each residue, while ignoring inter-residue MI terms.  $S_1^{\text{MIE}}$ ,  $S_2^{\text{MIE}}$  and  $S_3^{\text{MIE}}$  are the first, second, and third order MIE approximations of the full dihedral conformational entropy, respectively.  $S_2^{\text{MIE,fit}}$  and  $S_3^{\text{MIE,fit}}$  are the asymptotes of least squares, hyperbolic fits of  $S_2^{\text{MIE}}$  and  $S_3^{\text{MIE}}$  as functions of time.  $t_2^{\text{MIE,fit}}$  and  $t_3^{\text{MIE,fit}}$  are the simulation times ( $\mu\text{s}$ ) required to converge  $S_2^{\text{MIE}}$  and  $S_3^{\text{MIE}}$ , respectively, to within 1 cal/mol/K of their asymptotes. To estimate statistical uncertainty, simulation trajectories of each oligoglycine were split into five contiguous blocks and the standard deviation of each entropy estimate was calculated across the blocks. These are reported in parentheses. Slopes were estimated from linear least squares fits, which yielded  $R^2 \geq 0.99$  for all entropy estimates.

| Num.  | $S^{\text{QHA}}$ | $S^{\text{BQH}}$ | $S_1^{\text{MIE}}$ | $S_{\text{res}}^{\text{MIE}}$ | $S_2^{\text{MIE}}$ | $S_2^{\text{MIE,fit}}$ | $S_3^{\text{MIE}}$ | $S_3^{\text{MIE,fit}}$ | $t_2^{\text{MIE,fit}}$ | $t_3^{\text{MIE,fit}}$ |
|-------|------------------|------------------|--------------------|-------------------------------|--------------------|------------------------|--------------------|------------------------|------------------------|------------------------|
| 3     | 16.48 (0.06)     | 15.26 (0.05)     | 15.28 (0.05)       | 13.99 (0.04)                  | 13.35 (0.06)       | 13.63 (0.11)           | 12.84              | 13.46                  | 0.14                   | 0.23                   |
| 4     | 22.01 (0.09)     | 20.38 (0.07)     | 20.42 (0.06)       | 18.68 (0.05)                  | 17.87 (0.10)       | 18.27 (0.10)           | 17.02              | 17.92                  | 0.29                   | 0.57                   |
| 5     | 27.56 (0.05)     | 25.55 (0.05)     | 25.62 (0.05)       | 23.41 (0.04)                  | 22.45 (0.10)       | 22.70 (0.27)           | 21.29              | 22.23                  | 0.48                   | 1.15                   |
| 10    | 55.44 (0.11)     | 51.54 (0.10)     | 51.73 (0.10)       | 47.00 (0.13)                  | 42.83 (0.26)       | 45.06 (0.59)           | 32.45              | 42.41                  | 2.35                   | 9.77                   |
| 15    | 83.27 (0.13)     | 77.78 (0.27)     | 78.14 (0.23)       | 71.00 (0.28)                  | 63.03 (0.99)       | 68.07 (2.14)           | 29.76              | 59.73                  | 5.92                   | 34.64                  |
| Slope | 5.57             | 5.21             | 5.24               | 4.75                          | 4.12               | 4.52                   | 1.43               | 3.86                   |                        |                        |

Table S2: MIE conformational entropy estimates (cal/mol/K) of Gly<sub>15</sub> as a function of end-to-end distance ( $R$ ). Separate implicit solvent simulations were performed with the end-to-end distance of Gly<sub>15</sub> constrained to eight different values of  $R$  with a harmonic potential. Each simulation trajectory was split into five blocks and the standard deviation of the entropy across the blocks is reported in parentheses.

| $R$ (Å) | $S_1^{\text{MIE}}$ | $S_{\text{res}}^{\text{MIE}}$ | $S_2^{\text{MIE,fit}}$ | $S_3^{\text{MIE,fit}}$ | $t_2^{\text{MIE,fit}}(\mu\text{s})$ | $t_3^{\text{MIE,fit}}(\mu\text{s})$ |
|---------|--------------------|-------------------------------|------------------------|------------------------|-------------------------------------|-------------------------------------|
| 5       | 77.55 (0.03)       | 69.43 (0.06)                  | 67.08 (0.27)           | 63.01                  | 5.20                                | 28.39                               |
| 10      | 77.57 (0.05)       | 69.37 (0.07)                  | 66.97 (0.12)           | 62.87                  | 5.21                                | 28.29                               |
| 15      | 77.65 (0.05)       | 69.51 (0.10)                  | 67.12 (0.21)           | 63.11                  | 5.16                                | 28.31                               |
| 20      | 77.69 (0.04)       | 69.64 (0.04)                  | 67.49 (0.11)           | 63.63                  | 5.14                                | 27.95                               |
| 25      | 77.81 (0.02)       | 69.98 (0.05)                  | 68.08 (0.15)           | 64.51                  | 5.13                                | 27.80                               |
| 30      | 77.73 (0.03)       | 70.22 (0.05)                  | 68.40 (0.09)           | 65.05                  | 5.11                                | 27.80                               |
| 35      | 77.30 (0.04)       | 70.29 (0.05)                  | 68.56 (0.15)           | 65.40                  | 5.06                                | 27.51                               |
| 40      | 76.31 (0.06)       | 70.05 (0.05)                  | 67.90 (0.12)           | 64.79                  | 5.00                                | 27.07                               |

Table S3: MIE conformational entropy estimates (cal/mol/K) of Gly<sub>15</sub> as a function of radius of gyration ( $R_g$ ). Implicit solvent simulations of Gly<sub>15</sub> with constrained end-to-end distances were partitioned by  $R_g \pm 0.5$  Å. Trajectories at each  $R_g$  were split into five blocks and the standard deviation of each entropy estimate across the blocks is reported in parentheses

| $R_g$ (Å) | $S_1^{\text{MIE}}$ | $S_{\text{res}}^{\text{MIE}}$ | $S_2^{\text{MIE,fit}}$ | $S_3^{\text{MIE,fit}}$ | $t_2^{\text{MIE,fit}}(\mu\text{s})$ | $t_3^{\text{MIE,fit}}(\mu\text{s})$ |
|-----------|--------------------|-------------------------------|------------------------|------------------------|-------------------------------------|-------------------------------------|
| 6         | 76.75 (0.06)       | 68.20 (0.10)                  | 64.46 (0.41)           | 59.06                  | 5.18                                | 28.17                               |
| 7         | 77.36 (0.22)       | 69.23 (0.34)                  | 67.22 (0.93)           | 63.05                  | 5.07                                | 27.28                               |
| 8         | 77.70 (0.29)       | 69.79 (0.58)                  | 68.09 (1.11)           | 63.47                  | 4.90                                | 26.61                               |
| 9         | 77.74 (0.31)       | 69.89 (0.46)                  | 68.03 (1.06)           | 63.37                  | 4.97                                | 27.05                               |
| 10        | 77.70 (0.21)       | 70.04 (0.30)                  | 68.20 (0.67)           | 63.69                  | 5.02                                | 27.08                               |
| 11        | 77.47 (0.18)       | 70.16 (0.21)                  | 68.46 (0.27)           | 64.57                  | 5.08                                | 27.31                               |
| 12        | 76.99 (0.33)       | 70.19 (0.26)                  | 68.42 (0.45)           | 64.94                  | 5.07                                | 27.18                               |
| 13        | 76.05 (0.37)       | 69.83 (0.27)                  | 67.59 (0.34)           | 63.53                  | 5.10                                | 27.27                               |

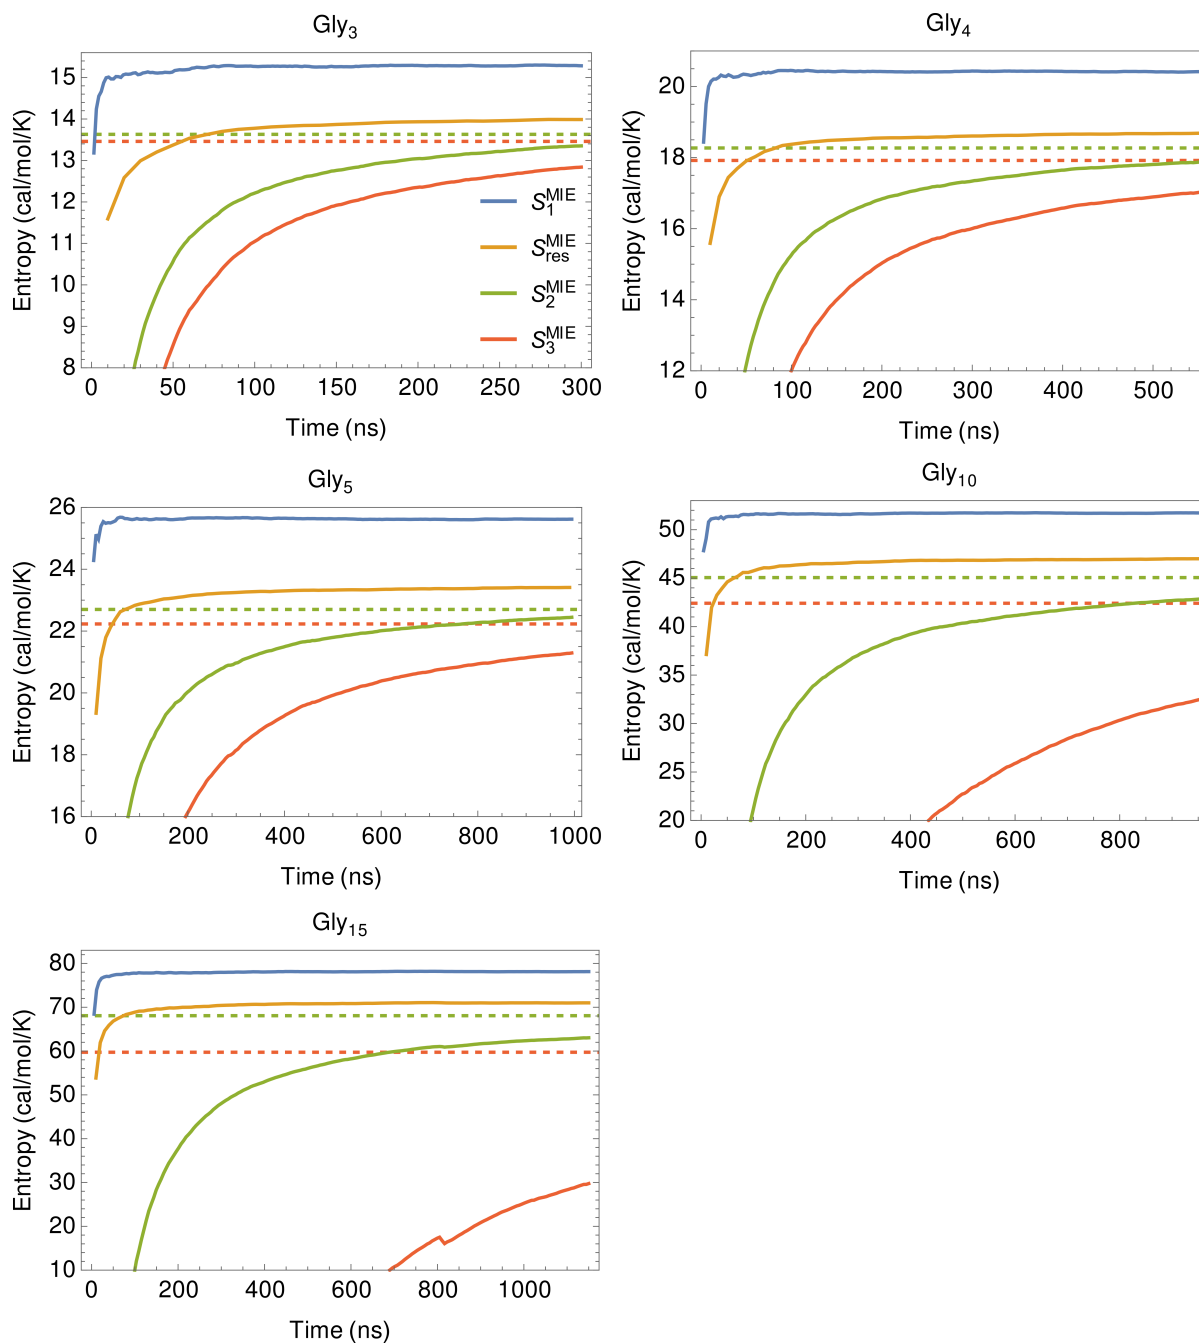

Figure S1: Trajectories of MIE conformational entropy estimates with respect to time. One-dimensional, independent entropy was calculated from the probability distribution for each backbone dihedral angle using the Boltzmann entropy expression. The dashed lines indicate the asymptotes,  $S_2^{\text{MIE,fit}}$  and  $S_3^{\text{MIE,fit}}$ , calculated from the hyperbolic fits of the  $S_2^{\text{MIE}}$  and  $S_3^{\text{MIE}}$  trajectories, respectively, and are colored accordingly.
